# Supplementary material for: An Analysis of the Possible Migration Routes of Oedaleus decorus asiaticus Bey-Bienko (Orthoptera: Acrididae) from Mongolia to China
Source: Insects. 2022 Jan 10;13(1):72. doi: 10.3390/insects13010072 (PMC8781545; doi:10.3390/insects13010072)
Supplement: Supplementary file 1 [file insects-13-00072-s001.zip › insects-1474041-supplementary.pdf]

**Table S1.** The meteorological systems in the immigration peaks in Yanqing from 2012 to 2017.

| Peak Period       | Landing Factor |           |                         |               |
|-------------------|----------------|-----------|-------------------------|---------------|
|                   | Wind Shear     | Downdraft | Low Temperature Barrier | Precipitation |
| 19 July 2012      | +              | +         |                         |               |
| 20 July 2012      |                |           |                         |               |
| 23 July 2012      |                |           |                         |               |
| 26 July 2012      |                |           |                         | +             |
| 04 August 2012    |                |           |                         |               |
| 22 August 2012    |                | +         |                         |               |
| 08 July 2013      | +              |           |                         | +             |
| 16 July 2013      |                |           |                         | +             |
| 17 July 2013      |                |           |                         |               |
| 18 July 2013      | +              |           |                         | +             |
| 28 July 2013      |                | +         |                         |               |
| 10 August 2013    |                |           |                         |               |
| 12 August 2013    |                |           |                         | +             |
| 14 August 2013    |                |           |                         |               |
| 15 August 2013    | +              |           |                         |               |
| 16 August 2013    | +              | +         |                         |               |
| 24 August 2013    |                | +         |                         |               |
| 30 June 2014      |                |           |                         | +             |
| 19 July 2014      |                |           |                         |               |
| 20 July 2014      | +              |           |                         |               |
| 21 July 2014      |                | +         |                         | +             |
| 02 August 2014    |                |           |                         |               |
| 03 August 2014    | +              | +         |                         |               |
| 11 August 2014    |                | +         |                         |               |
| 19 August 2014    | +              |           |                         |               |
| 13 July 2015      | +              | +         |                         |               |
| 15 July 2015      | +              | +         |                         | +             |
| 16 July 2015      |                |           |                         | +             |
| 22 July 2015      | +              |           |                         | +             |
| 26 July 2015      |                | +         |                         |               |
| 28 July 2015      |                | +         |                         | +             |
| 14 August 2015    |                | +         |                         |               |
| 15 August 2015    | +              | +         |                         |               |
| 21 August 2015    | +              | +         |                         | +             |
| 24 August 2015    |                |           |                         | +             |
| 04 September 2015 |                | +         |                         | +             |
| 26 July 2016      |                |           |                         |               |
| 29 July 2016      |                |           |                         | +             |

|                      |   |   |   |
|----------------------|---|---|---|
| 08 July 2017         | + | + |   |
| 09 July 2017         | + | + |   |
| 11 July 2017         |   | + |   |
| 12 July 2017         |   | + |   |
| 16 July 2017         |   |   |   |
| 18 July 2017         |   |   | + |
| 19 July 2017         |   |   |   |
| 20 July 2017         | + | + | + |
| 29 July 2017         |   |   |   |
| 03 August 2017       |   | + |   |
| 07 August 2017       | + | + |   |
| 11 August 2017       |   | + | + |
| 12 August 2017       |   |   | + |
| 13 August 2017       |   |   | + |
| 14 August 2017       |   | + |   |
| 15 August 2017       | + | + | + |
| 16 August 2017       | + | + | + |
| 17 August 2017       |   | + |   |
| 18 August 2017       |   |   | + |
| 19 August 2017       |   | + | + |
| 20 August 2017       |   | + |   |
| 21 August 2017       | + | + |   |
| 22 August 2017       | + |   | + |
| 23 August 2017       |   |   |   |
| 31 August 2017       | + |   |   |
| 01 September<br>2017 |   |   |   |
| 02 September<br>2017 |   |   |   |
| 04 September<br>2017 |   |   |   |
| 08 September<br>2017 |   |   |   |
| 09 September<br>2017 | + |   |   |
| 11 September<br>2017 | + |   |   |

---

Note: + The factor bringing out immigration peaks of *Oedaleus asiaticus*.
